# Supplementary material for: Synergistic toxicity and physiological impact of imidacloprid alone and binary mixtures with seven representative pesticides on honey bee (Apis mellifera)
Source: PubMed Central journal article supplement (PMC5414993; doi:10.1371/journal.pone.0176837), 2017-05-03
Supplement: pone.0176837.s001.pdf [file pone.0176837.s001.pdf]

## Mortality data

## Enzyme data

| input mixture | \$ treat  | \$ rep | dead0h | total dead | dead48h | dead | mortalit | @; | input mix | \$ treat | \$ rep | enzyme | \$ ActiFold | @; |
|---------------|-----------|--------|--------|------------|---------|------|----------|----|-----------|----------|--------|--------|-------------|----|
| cards;        |           |        |        |            |         |      |          |    | cards;    |          |        |        |             |    |
| CK-1          | H2O       | 1      | 0      | 25         | 0       | 0    | 0.0000   |    | mix0      | CK       | 1      | GST    | 1.166826    |    |
| CK-2          | H2O       | 2      | 2      | 23         | 2       | 0    | 0.0000   |    | mix0      | CK       | 2      | GST    | 0.957383    |    |
| CK-3          | H2O       | 3      | 5      | 20         | 5       | 0    | 0.0000   |    | mix0      | CK       | 3      | GST    | 0.875792    |    |
| AdvBra        | Advi274B  | 1      | 2      | 23         | 5       | 3    | 0.1304   |    | mix0      | 2ck      | 1      | GST    | 1.166826    |    |
| AdvBra        | Advi274B  | 2      | 0      | 25         | 6       | 6    | 0.2400   |    | mix0      | 2ck      | 2      | GST    | 0.957383    |    |
| AdvBra        | Advi274B  | 3      | 0      | 25         | 3       | 3    | 0.1200   |    | mix0      | 2ck      | 3      | GST    | 0.875792    |    |
| AdvBra        | Brack91   | 1      | 3      | 22         | 10      | 7    | 0.3182   |    | mix0      | 3ck      | 1      | GST    | 1.166826    |    |
| AdvBra        | Brack91   | 2      | 0      | 25         | 11      | 11   | 0.4400   |    | mix0      | 3ck      | 2      | GST    | 0.957383    |    |
| AdvBra        | Brack91   | 3      | 1      | 24         | 7       | 6    | 0.2500   |    | mix0      | 3ck      | 3      | GST    | 0.875792    |    |
| AdvBra        | AdviBrack | 1      | 0      | 25         | 20      | 20   | 0.8000   |    | mixb      | AdviB    | 1      | GST    | 0.836928    |    |
| AdvBra        | AdviBrack | 2      | 0      | 25         | 16      | 16   | 0.6400   |    | mixb      | AdviB    | 2      | GST    | 0.828455    |    |
| AdvBra        | AdviBrack | 3      | 0      | 25         | 9       | 9    | 0.3600   |    | mixb      | AdviB    | 3      | GST    | 0.946929    |    |
| AdvKar        | Advi274K  | 1      | 2      | 23         | 5       | 3    | 0.1304   |    | mixb      | Brac     | 1      | GST    | 0.931212    |    |
| AdvKar        | Advi274K  | 2      | 0      | 25         | 6       | 6    | 0.2400   |    | mixb      | Brac     | 2      | GST    | 1.025762    |    |
| AdvKar        | Advi274K  | 3      | 0      | 25         | 3       | 3    | 0.1200   |    | mixb      | Brac     | 3      | GST    | 1.063434    |    |
| AdvKar        | Karat273  | 1      | 0      | 25         | 0       | 0    | 0.0000   |    | mixb      | AdviBrac | 1      | GST    | 0.892903    |    |
| AdvKar        | Karat273  | 2      | 1      | 24         | 2       | 1    | 0.0417   |    | mixb      | AdviBrac | 2      | GST    | 0.837479    |    |
| AdvKar        | Karat273  | 3      | 1      | 24         | 1       | 0    | 0.0000   |    | mixb      | AdviBrac | 3      | GST    | 0.919398    |    |
| AdvKar        | AdviKara  | 1      | 1      | 24         | 2       | 1    | 0.0417   |    | mixk      | AdviK    | 1      | GST    | 0.836928    |    |
| AdvKar        | AdviKara  | 2      | 0      | 25         | 8       | 8    | 0.3200   |    | mixk      | AdviK    | 2      | GST    | 0.828455    |    |
| AdvKar        | AdviKara  | 3      | 0      | 25         | 7       | 7    | 0.2800   |    | mixk      | AdviK    | 3      | GST    | 0.946929    |    |
| AdvVyd        | Advi274V  | 1      | 2      | 23         | 5       | 3    | 0.1304   |    | mixk      | Kara     | 1      | GST    | 0.827258    |    |
| AdvVyd        | Advi274V  | 2      | 0      | 25         | 6       | 6    | 0.2400   |    | mixk      | Kara     | 2      | GST    | 0.909855    |    |
| AdvVyd        | Advi274V  | 3      | 0      | 25         | 3       | 3    | 0.1200   |    | mixk      | Kara     | 3      | GST    | 0.833765    |    |
| AdvVyd        | Vydat162  | 1      | 4      | 21         | 10      | 6    | 0.2857   |    | mixk      | AdviKara | 1      | GST    | 0.98348     |    |
| AdvVyd        | Vydat162  | 2      | 1      | 24         | 4       | 3    | 0.1250   |    | mixk      | AdviKara | 2      | GST    | 0.865213    |    |
| AdvVyd        | Vydat162  | 3      | 4      | 21         | 6       | 2    | 0.0952   |    | mixk      | AdviKara | 3      | GST    | 0.999091    |    |
| AdvVyd        | AdviVyda  | 1      | 0      | 25         | 13      | 13   | 0.5200   |    | mixv      | AdviV    | 1      | GST    | 0.836928    |    |
| AdvVyd        | AdviVyda  | 2      | 1      | 24         | 12      | 11   | 0.4583   |    | mixv      | AdviV    | 2      | GST    | 0.828455    |    |
| AdvVyd        | AdviVyda  | 3      | 2      | 23         | 20      | 18   | 0.7826   |    | mixv      | AdviV    | 3      | GST    | 0.946929    |    |
| AdvDom        | Advi274D  | 1      | 2      | 23         | 5       | 3    | 0.1304   |    | mixv      | Vyda     | 1      | GST    | 1.0678      |    |
| AdvDom        | Advi274D  | 2      | 0      | 25         | 6       | 6    | 0.2400   |    | mixv      | Vyda     | 2      | GST    | 1.044419    |    |
| AdvDom        | Advi274D  | 3      | 0      | 25         | 3       | 3    | 0.1200   |    | mixv      | Vyda     | 3      | GST    | 0.975777    |    |
| AdvDom        | Doma2500  | 1      | 1      | 24         | 4       | 3    | 0.1250   |    | mixv      | AdviVyda | 1      | GST    | 0.862423    |    |
| AdvDom        | Doma2500  | 2      | 2      | 23         | 2       | 0    | 0.0000   |    | mixv      | AdviVyda | 2      | GST    | 0.860549    |    |
| AdvDom        | Doma2500  | 3      | 2      | 23         | 2       | 0    | 0.0000   |    | mixv      | AdviVyda | 3      | GST    | 0.892603    |    |
| AdvDom        | AdviDoma  | 1      | 1      | 24         | 8       | 7    | 0.2917   |    | mixd      | AdviD    | 1      | GST    | 0.836928    |    |
| AdvDom        | AdviDoma  | 2      | 0      | 25         | 8       | 8    | 0.3200   |    | mixd      | AdviD    | 2      | GST    | 0.828455    |    |
| AdvDom        | AdviDoma  | 3      | 3      | 22         | 16      | 13   | 0.5909   |    | mixd      | AdviD    | 3      | GST    | 0.946929    |    |
| AdvRou        | Advi274R  | 1      | 2      | 23         | 5       | 3    | 0.1304   |    | mixd      | Doma     | 1      | GST    | 0.780117    |    |
| AdvRou        | Advi274R  | 2      | 0      | 25         | 6       | 6    | 0.2400   |    | mixd      | Doma     | 2      | GST    | 0.938525    |    |
| AdvRou        | Advi274R  | 3      | 0      | 25         | 3       | 3    | 0.1200   |    | mixd      | Doma     | 3      | GST    | 1.055103    |    |
| AdvRou        | Roun2500  | 1      | 0      | 25         | 0       | 0    | 0.0000   |    | mixd      | AdviDom: | 1      | GST    | 1.124188    |    |
| AdvRou        | Roun2500  | 2      | 0      | 25         | 0       | 0    | 0.0000   |    | mixd      | AdviDom: | 2      | GST    | 0.991731    |    |

|                                                  |          |      |   |    |    |    |        |       |          |   |     |          |
|--------------------------------------------------|----------|------|---|----|----|----|--------|-------|----------|---|-----|----------|
| AdvRou                                           | Roun2500 | 3    | 0 | 25 | 0  | 0  | 0.0000 | mixd  | AdviDom: | 3 | GST | 0.965243 |
| AdvRou                                           | AdviRoun | 1    | 0 | 25 | 8  | 8  | 0.3200 | mixr  | AdviR    | 1 | GST | 0.836928 |
| AdvRou                                           | AdviRoun | 2    | 1 | 24 | 1  | 0  | 0.0000 | mixr  | AdviR    | 2 | GST | 0.828455 |
| AdvRou                                           | AdviRoun | 3    | 3 | 22 | 5  | 2  | 0.0909 | mixr  | AdviR    | 3 | GST | 0.946929 |
| AdvBel                                           | Adv274BL | 1    | 2 | 23 | 5  | 3  | 0.1304 | mixr  | Roun     | 1 | GST | 1.078726 |
| AdvBel                                           | Adv274BL | 2    | 0 | 25 | 6  | 6  | 0.2400 | mixr  | Roun     | 2 | GST | 0.902525 |
| AdvBel                                           | Adv274BL | 3    | 0 | 25 | 3  | 3  | 0.1200 | mixr  | Roun     | 3 | GST | 0.931402 |
| AdvBel                                           | Belay40  | 1    | 1 | 24 | 2  | 1  | 0.0417 | mixr  | AdviRoun | 1 | GST | 0.8559   |
| AdvBel                                           | Belay40  | 2    | 0 | 25 | 5  | 5  | 0.2000 | mixr  | AdviRoun | 2 | GST | 0.940512 |
| AdvBel                                           | Belay40  | 3    | 2 | 23 | 6  | 4  | 0.1739 | mixr  | AdviRoun | 3 | GST | 0.907553 |
| AdvBel                                           | AdviBela | 1    | 1 | 24 | 9  | 8  | 0.3333 | mixbl | AdviBL   | 1 | GST | 0.836928 |
| AdvBel                                           | AdviBela | 2    | 1 | 24 | 9  | 8  | 0.3333 | mixbl | AdviBL   | 2 | GST | 0.828455 |
| AdvBel                                           | AdviBela | 3    | 0 | 25 | 4  | 4  | 0.1600 | mixbl | AdviBL   | 3 | GST | 0.946929 |
| AdvTra                                           | Advi274T | 1    | 2 | 23 | 5  | 3  | 0.1304 | mixbl | Bela     | 1 | GST | 0.991218 |
| AdvTra                                           | Advi274T | 2    | 0 | 25 | 6  | 6  | 0.2400 | mixbl | Bela     | 2 | GST | 1.014612 |
| AdvTra                                           | Advi274T | 3    | 0 | 25 | 3  | 3  | 0.1200 | mixbl | Bela     | 3 | GST | 1.079115 |
| AdvTra                                           | Trans117 | 1    | 0 | 25 | 1  | 1  | 0.0400 | mixbl | AdviBela | 1 | GST | 0.957951 |
| AdvTra                                           | Trans117 | 2    | 0 | 25 | 4  | 4  | 0.1600 | mixbl | AdviBela | 2 | GST | 1.148515 |
| AdvTra                                           | Trans117 | 3    | 1 | 24 | 2  | 1  | 0.0417 | mixbl | AdviBela | 3 | GST | 1.00907  |
| AdvTra                                           | AdviTran | 1    | 2 | 23 | 14 | 12 | 0.5217 | mixt  | AdviT    | 1 | GST | 0.836928 |
| AdvTra                                           | AdviTran | 2    | 0 | 25 | 10 | 10 | 0.4000 | mixt  | AdviT    | 2 | GST | 0.828455 |
| AdvTra                                           | AdviTran | 3    | 2 | 23 | 8  | 6  | 0.2609 | mixt  | AdviT    | 3 | GST | 0.946929 |
| Adv8Pest                                         | Advi2748 | 1    | 2 | 23 | 5  | 3  | 0.1304 | mixt  | Tran     | 1 | GST | 0.884647 |
| Adv8Pest                                         | Advi2748 | 2    | 0 | 25 | 6  | 6  | 0.2400 | mixt  | Tran     | 2 | GST | 0.883413 |
| Adv8Pest                                         | Advi2748 | 3    | 0 | 25 | 3  | 3  | 0.1200 | mixt  | Tran     | 3 | GST | 0.900054 |
| Adv8Pest                                         | 8Pestici | 1    | 0 | 25 | 25 | 25 | 1.0000 | mixt  | AdviTran | 1 | GST | 0.98443  |
| Adv8Pest                                         | 8Pestici | 2    | 2 | 23 | 25 | 23 | 1.0000 | mixt  | AdviTran | 2 | GST | 0.997147 |
| Adv8Pest                                         | 8Pestici | 3    | 0 | 25 | 25 | 25 | 1.0000 | mixt  | AdviTran | 3 | GST | 0.915281 |
| Adv8Pest                                         | Pestic8  | 1    | 0 | 25 | 25 | 25 | 1.0000 | mix0  | CK       | 1 | Est | 1.04318  |
| Adv8Pest                                         | Pestic8  | 2    | 2 | 23 | 25 | 23 | 1.0000 | mix0  | CK       | 2 | Est | 1.04472  |
| Adv8Pest                                         | Pestic8  | 3    | 0 | 25 | 25 | 25 | 1.0000 | mix0  | CK       | 3 | Est | 0.9121   |
| run;                                             |          |      |   |    |    |    |        | mix0  | 2ck      | 1 | Est | 1.04318  |
|                                                  |          |      |   |    |    |    |        | mix0  | 2ck      | 2 | Est | 1.04472  |
|                                                  |          |      |   |    |    |    |        | mix0  | 2ck      | 3 | Est | 0.9121   |
| Specific inhibition data                         |          |      |   |    |    |    |        | mix0  | 3ck      | 1 | Est | 1.04318  |
| input treat \$ rep mixture \$ mortalit @; cards; |          |      |   |    |    |    |        | mix0  | 3ck      | 2 | Est | 1.04472  |
| control                                          | 1 CK     |      | 0 |    |    |    |        | mix0  | 3ck      | 3 | Est | 0.9121   |
| control                                          | 2 CK     |      | 0 |    |    |    |        | mixb  | AdviB    | 1 | Est | 0.900738 |
| control                                          | 3 CK     |      | 0 |    |    |    |        | mixb  | AdviB    | 2 | Est | 0.908683 |
| control                                          | 4 CK     |      | 0 |    |    |    |        | mixb  | AdviB    | 3 | Est | 1.044496 |
| control                                          | 5 CK     |      | 0 |    |    |    |        | mixb  | Brac     | 1 | Est | 0.651975 |
| acetone                                          | 1 CK     | 4.35 |   |    |    |    |        | mixb  | Brac     | 2 | Est | 0.509723 |
| acetone                                          | 2 CK     |      | 0 |    |    |    |        | mixb  | Brac     | 3 | Est | 0.644935 |
| acetone                                          | 3 CK     |      | 0 |    |    |    |        | mixb  | AdviBrac | 1 | Est | 0.578792 |
| acetone                                          | 4 CK     |      | 0 |    |    |    |        | mixb  | AdviBrac | 2 | Est | 0.562499 |
| acetone                                          | 5 CK     |      | 0 |    |    |    |        | mixb  | AdviBrac | 3 | Est | 0.515803 |
| AdviseP                                          | 1 PBO    |      | 4 |    |    |    |        | mixk  | AdviK    | 1 | Est | 0.900738 |

|         |       |      |       |          |       |          |
|---------|-------|------|-------|----------|-------|----------|
| AdviseP | 2 PBO | 24   | mixk  | AdviK    | 2 Est | 0.908683 |
| AdviseP | 3 PBO | 8    | mixk  | AdviK    | 3 Est | 1.044496 |
| AdviseP | 4 PBO | 12   | mixk  | Kara     | 1 Est | 1.158624 |
| AdviseP | 5 PBO | 16.7 | mixk  | Kara     | 2 Est | 0.970594 |
| PBO     | 1 PBO | 0    | mixk  | Kara     | 3 Est | 1.059393 |
| PBO     | 2 PBO | 0    | mixk  | AdviKara | 1 Est | 1.006303 |
| PBO     | 3 PBO | 0    | mixk  | AdviKara | 2 Est | 0.918429 |
| PBO     | 4 PBO | 0    | mixk  | AdviKara | 3 Est | 1.042259 |
| PBO     | 5 PBO | 4    | mixv  | AdviV    | 1 Est | 0.900738 |
| AdviPBO | 1 PBO | 64   | mixv  | AdviV    | 2 Est | 0.908683 |
| AdviPBO | 2 PBO | 81.6 | mixv  | AdviV    | 3 Est | 1.044496 |
| AdviPBO | 3 PBO | 88   | mixv  | Vyda     | 1 Est | 1.039329 |
| AdviPBO | 4 PBO | 100  | mixv  | Vyda     | 2 Est | 1.106371 |
| AdviPBO | 5 PBO | 64   | mixv  | Vyda     | 3 Est | 1.009599 |
| AdviseT | 1 TPP | 4    | mixv  | AdviVyda | 1 Est | 0.945079 |
| AdviseT | 2 TPP | 24   | mixv  | AdviVyda | 2 Est | 0.7402   |
| AdviseT | 3 TPP | 8    | mixv  | AdviVyda | 3 Est | 0.936306 |
| AdviseT | 4 TPP | 12   | mixd  | AdviD    | 1 Est | 0.900738 |
| AdviseT | 5 TPP | 16.7 | mixd  | AdviD    | 2 Est | 0.908683 |
| TPP     | 1 TPP | 0    | mixd  | AdviD    | 3 Est | 1.044496 |
| TPP     | 2 TPP | 0    | mixd  | Doma     | 1 Est | 0.944395 |
| TPP     | 3 TPP | 0    | mixd  | Doma     | 2 Est | 1.00909  |
| TPP     | 4 TPP | 0    | mixd  | Doma     | 3 Est | 0.950976 |
| TPP     | 5 TPP | 0    | mixd  | AdviDom: | 1 Est | 1.282564 |
| AdviTPP | 1 TPP | 8    | mixd  | AdviDom: | 2 Est | 1.419606 |
| AdviTPP | 2 TPP | 12   | mixd  | AdviDom: | 3 Est | 1.124493 |
| AdviTPP | 3 TPP | 24   | mixr  | AdviR    | 1 Est | 0.900738 |
| AdviTPP | 4 TPP | 12   | mixr  | AdviR    | 2 Est | 0.908683 |
| AdviTPP | 5 TPP | 4.17 | mixr  | AdviR    | 3 Est | 1.044496 |
| AdviseD | 1 DEM | 4    | mixr  | Roun     | 1 Est | 1.229198 |
| AdviseD | 2 DEM | 24   | mixr  | Roun     | 2 Est | 1.172149 |
| AdviseD | 3 DEM | 8    | mixr  | Roun     | 3 Est | 1.01334  |
| AdviseD | 4 DEM | 12   | mixr  | AdviRoun | 1 Est | 1.109334 |
| AdviseD | 5 DEM | 16.7 | mixr  | AdviRoun | 2 Est | 1.184475 |
| DEM     | 1 DEM | 0    | mixr  | AdviRoun | 3 Est | 1.18101  |
| DEM     | 2 DEM | 0    | mixbl | AdviBL   | 1 Est | 0.900738 |
| DEM     | 3 DEM | 0    | mixbl | AdviBL   | 2 Est | 0.908683 |
| DEM     | 4 DEM | 0    | mixbl | AdviBL   | 3 Est | 1.044496 |
| DEM     | 5 DEM | 0    | mixbl | Bela     | 1 Est | 1.136229 |
| AdviDEM | 1 DEM | 12   | mixbl | Bela     | 2 Est | 1.00292  |
| AdviDEM | 2 DEM | 4.17 | mixbl | Bela     | 3 Est | 1.138533 |
| AdviDEM | 3 DEM | 4    | mixbl | AdviBela | 1 Est | 1.380168 |
| AdviDEM | 4 DEM | 0    | mixbl | AdviBela | 2 Est | 1.473234 |
| AdviDEM | 5 DEM | 8.7  | mixbl | AdviBela | 3 Est | 1.17191  |
| run;    |       |      | mixt  | AdviT    | 1 Est | 0.900738 |
|         |       |      | mixt  | AdviT    | 2 Est | 0.908683 |
|         |       |      | mixt  | AdviT    | 3 Est | 1.044496 |

|      |          |        |          |
|------|----------|--------|----------|
| mixt | Tran     | 1 Est  | 1.102876 |
| mixt | Tran     | 2 Est  | 1.093489 |
| mixt | Tran     | 3 Est  | 1.049073 |
| mixt | AdviTran | 1 Est  | 1.073706 |
| mixt | AdviTran | 2 Est  | 1.242451 |
| mixt | AdviTran | 3 Est  | 1.159836 |
| mix0 | CK       | 1 AChE | 1.104855 |
| mix0 | CK       | 2 AChE | 1.01478  |
| mix0 | CK       | 3 AChE | 0.880365 |
| mix0 | 2ck      | 1 AChE | 1.104855 |
| mix0 | 2ck      | 2 AChE | 1.01478  |
| mix0 | 2ck      | 3 AChE | 0.880365 |
| mix0 | 3ck      | 1 AChE | 1.104855 |
| mix0 | 3ck      | 2 AChE | 1.01478  |
| mix0 | 3ck      | 3 AChE | 0.880365 |
| mixb | AdviB    | 1 AChE | 0.922264 |
| mixb | AdviB    | 2 AChE | 0.955662 |
| mixb | AdviB    | 3 AChE | 1.022142 |
| mixb | Brac     | 1 AChE | 0.518259 |
| mixb | Brac     | 2 AChE | 0.438243 |
| mixb | Brac     | 3 AChE | 0.567404 |
| mixb | AdviBrac | 1 AChE | 0.453453 |
| mixb | AdviBrac | 2 AChE | 0.424103 |
| mixb | AdviBrac | 3 AChE | 0.375142 |
| mixk | AdviK    | 1 AChE | 0.922264 |
| mixk | AdviK    | 2 AChE | 0.955662 |
| mixk | AdviK    | 3 AChE | 1.022142 |
| mixk | Kara     | 1 AChE | 0.999904 |
| mixk | Kara     | 2 AChE | 0.987559 |
| mixk | Kara     | 3 AChE | 1.012239 |
| mixk | AdviKara | 1 AChE | 1.120917 |
| mixk | AdviKara | 2 AChE | 0.882109 |
| mixk | AdviKara | 3 AChE | 0.93918  |
| mixv | AdviV    | 1 AChE | 0.922264 |
| mixv | AdviV    | 2 AChE | 0.955662 |
| mixv | AdviV    | 3 AChE | 1.022142 |
| mixv | Vyda     | 1 AChE | 1.082095 |
| mixv | Vyda     | 2 AChE | 1.083049 |
| mixv | Vyda     | 3 AChE | 0.962919 |
| mixv | AdviVyda | 1 AChE | 0.976266 |
| mixv | AdviVyda | 2 AChE | 0.620053 |
| mixv | AdviVyda | 3 AChE | 1.063125 |
| mixd | AdviD    | 1 AChE | 0.922264 |
| mixd | AdviD    | 2 AChE | 0.955662 |
| mixd | AdviD    | 3 AChE | 1.022142 |
| mixd | Doma     | 1 AChE | 0.975979 |
| mixd | Doma     | 2 AChE | 1.098239 |

|       |          |        |          |
|-------|----------|--------|----------|
| mixd  | Doma     | 3 AChE | 1.135435 |
| mixd  | AdviDom: | 1 AChE | 1.222034 |
| mixd  | AdviDom: | 2 AChE | 1.192153 |
| mixd  | AdviDom: | 3 AChE | 1.004005 |
| mixr  | AdviR    | 1 AChE | 0.922264 |
| mixr  | AdviR    | 2 AChE | 0.955662 |
| mixr  | AdviR    | 3 AChE | 1.022142 |
| mixr  | Roun     | 1 AChE | 1.141109 |
| mixr  | Roun     | 2 AChE | 1.103434 |
| mixr  | Roun     | 3 AChE | 0.978342 |
| mixr  | AdviRoun | 1 AChE | 0.918632 |
| mixr  | AdviRoun | 2 AChE | 1.037766 |
| mixr  | AdviRoun | 3 AChE | 1.003027 |
| mixbl | AdviBL   | 1 AChE | 0.922264 |
| mixbl | AdviBL   | 2 AChE | 0.955662 |
| mixbl | AdviBL   | 3 AChE | 1.022142 |
| mixbl | Bela     | 1 AChE | 1.057557 |
| mixbl | Bela     | 2 AChE | 1.072632 |
| mixbl | Bela     | 3 AChE | 1.109905 |
| mixbl | AdviBela | 1 AChE | 0.965369 |
| mixbl | AdviBela | 2 AChE | 1.101466 |
| mixbl | AdviBela | 3 AChE | 0.86446  |
| mixt  | AdviT    | 1 AChE | 0.922264 |
| mixt  | AdviT    | 2 AChE | 0.955662 |
| mixt  | AdviT    | 3 AChE | 1.022142 |
| mixt  | Tran     | 1 AChE | 0.830135 |
| mixt  | Tran     | 2 AChE | 0.956967 |
| mixt  | Tran     | 3 AChE | 0.834796 |
| mixt  | AdviTran | 1 AChE | 0.979376 |
| mixt  | AdviTran | 2 AChE | 1.076134 |
| mixt  | AdviTran | 3 AChE | 0.969853 |
| mix0  | CK       | 1 PO   | 1.035769 |
| mix0  | CK       | 2 PO   | 0.887642 |
| mix0  | CK       | 3 PO   | 1.076589 |
| mix0  | 2ck      | 1 PO   | 1.035769 |
| mix0  | 2ck      | 2 PO   | 0.887642 |
| mix0  | 2ck      | 3 PO   | 1.076589 |
| mix0  | 3ck      | 1 PO   | 1.035769 |
| mix0  | 3ck      | 2 PO   | 0.887642 |
| mix0  | 3ck      | 3 PO   | 1.076589 |
| mixb  | AdviB    | 1 PO   | 1.037107 |
| mixb  | AdviB    | 2 PO   | 0.633852 |
| mixb  | AdviB    | 3 PO   | 0.813969 |
| mixb  | Brac     | 1 PO   | 0.715258 |
| mixb  | Brac     | 2 PO   | 1.249049 |
| mixb  | Brac     | 3 PO   | 0.793034 |
| mixb  | AdviBrac | 1 PO   | 1.151625 |

|       |          |      |          |
|-------|----------|------|----------|
| mixb  | AdviBrac | 2 PO | 0.88436  |
| mixb  | AdviBrac | 3 PO | 0.685348 |
| mixk  | AdviK    | 1 PO | 1.037107 |
| mixk  | AdviK    | 2 PO | 0.633852 |
| mixk  | AdviK    | 3 PO | 0.813969 |
| mixk  | Kara     | 1 PO | 1.210676 |
| mixk  | Kara     | 2 PO | 1.358588 |
| mixk  | Kara     | 3 PO | 1.081273 |
| mixk  | AdviKara | 1 PO | 1.49986  |
| mixk  | AdviKara | 2 PO | 1.019844 |
| mixk  | AdviKara | 3 PO | 1.171686 |
| mixv  | AdviV    | 1 PO | 1.037107 |
| mixv  | AdviV    | 2 PO | 0.633852 |
| mixv  | AdviV    | 3 PO | 0.813969 |
| mixv  | Vyda     | 1 PO | 1.256939 |
| mixv  | Vyda     | 2 PO | 0.872083 |
| mixv  | Vyda     | 3 PO | 1.079628 |
| mixv  | AdviVyda | 1 PO | 0.746742 |
| mixv  | AdviVyda | 2 PO | 0.365168 |
| mixv  | AdviVyda | 3 PO | 0.368815 |
| mixd  | AdviD    | 1 PO | 1.037107 |
| mixd  | AdviD    | 2 PO | 0.633852 |
| mixd  | AdviD    | 3 PO | 0.813969 |
| mixd  | Doma     | 1 PO | 0.829428 |
| mixd  | Doma     | 2 PO | 0.903781 |
| mixd  | Doma     | 3 PO | 0.691093 |
| mixd  | AdviDom: | 1 PO | 0.756975 |
| mixd  | AdviDom: | 2 PO | 0.504047 |
| mixd  | AdviDom: | 3 PO | 1.053665 |
| mixr  | AdviR    | 1 PO | 1.037107 |
| mixr  | AdviR    | 2 PO | 0.633852 |
| mixr  | AdviR    | 3 PO | 0.813969 |
| mixr  | Roun     | 1 PO | 0.839719 |
| mixr  | Roun     | 2 PO | 1.008924 |
| mixr  | Roun     | 3 PO | 1.585287 |
| mixr  | AdviRoun | 1 PO | 0.7068   |
| mixr  | AdviRoun | 2 PO | 1.021506 |
| mixr  | AdviRoun | 3 PO | 0.962446 |
| mixbl | AdviBL   | 1 PO | 1.037107 |
| mixbl | AdviBL   | 2 PO | 0.633852 |
| mixbl | AdviBL   | 3 PO | 0.813969 |
| mixbl | Bela     | 1 PO | 0.958831 |
| mixbl | Bela     | 2 PO | 1.292614 |
| mixbl | Bela     | 3 PO | 1.124852 |
| mixbl | AdviBela | 1 PO | 0.758043 |
| mixbl | AdviBela | 2 PO | 1.209121 |
| mixbl | AdviBela | 3 PO | 0.970108 |

|      |          |       |          |
|------|----------|-------|----------|
| mixt | AdviT    | 1 PO  | 1.037107 |
| mixt | AdviT    | 2 PO  | 0.633852 |
| mixt | AdviT    | 3 PO  | 0.813969 |
| mixt | Tran     | 1 PO  | 0.73229  |
| mixt | Tran     | 2 PO  | 0.739077 |
| mixt | Tran     | 3 PO  | 0.799622 |
| mixt | AdviTran | 1 PO  | 1.35822  |
| mixt | AdviTran | 2 PO  | 0.69619  |
| mixt | AdviTran | 3 PO  | 0.870368 |
| mix0 | CK       | 1 INV | 0.960366 |
| mix0 | CK       | 2 INV | 0.965512 |
| mix0 | CK       | 3 INV | 1.074122 |
| mix0 | 2ck      | 1 INV | 0.960366 |
| mix0 | 2ck      | 2 INV | 0.965512 |
| mix0 | 2ck      | 3 INV | 1.074122 |
| mix0 | 3ck      | 1 INV | 0.960366 |
| mix0 | 3ck      | 2 INV | 0.965512 |
| mix0 | 3ck      | 3 INV | 1.074122 |
| mixb | AdviB    | 1 INV | 0.875327 |
| mixb | AdviB    | 2 INV | 1.369971 |
| mixb | AdviB    | 3 INV | 1.432082 |
| mixb | Brac     | 1 INV | 1.851257 |
| mixb | Brac     | 2 INV | 1.563688 |
| mixb | Brac     | 3 INV | 1.148929 |
| mixb | AdviBrac | 1 INV | 1.243135 |
| mixb | AdviBrac | 2 INV | 1.038341 |
| mixb | AdviBrac | 3 INV | 1.275285 |
| mixk | AdviK    | 1 INV | 0.875327 |
| mixk | AdviK    | 2 INV | 1.369971 |
| mixk | AdviK    | 3 INV | 1.432082 |
| mixk | Kara     | 1 INV | 0.779818 |
| mixk | Kara     | 2 INV | 1.327239 |
| mixk | Kara     | 3 INV | 1.326776 |
| mixk | AdviKara | 1 INV | 1.665061 |
| mixk | AdviKara | 2 INV | 1.071374 |
| mixk | AdviKara | 3 INV | 1.452618 |
| mixv | AdviV    | 1 INV | 0.875327 |
| mixv | AdviV    | 2 INV | 1.369971 |
| mixv | AdviV    | 3 INV | 1.432082 |
| mixv | Vyda     | 1 INV | 1.0715   |
| mixv | Vyda     | 2 INV | 1.460921 |
| mixv | Vyda     | 3 INV | 1.471176 |
| mixv | AdviVyda | 1 INV | 0.931914 |
| mixv | AdviVyda | 2 INV | 1.124848 |
| mixv | AdviVyda | 3 INV | 1.064632 |
| mixd | AdviD    | 1 INV | 0.875327 |
| mixd | AdviD    | 2 INV | 1.369971 |

|       |          |   |     |          |
|-------|----------|---|-----|----------|
| mixd  | AdviD    | 3 | INV | 1.432082 |
| mixd  | Doma     | 1 | INV | 0.908655 |
| mixd  | Doma     | 2 | INV | 0.878113 |
| mixd  | Doma     | 3 | INV | 1.149408 |
| mixd  | AdviDom: | 1 | INV | 1.356537 |
| mixd  | AdviDom: | 2 | INV | 1.051919 |
| mixd  | AdviDom: | 3 | INV | 1.352098 |
| mixr  | AdviR    | 1 | INV | 0.875327 |
| mixr  | AdviR    | 2 | INV | 1.369971 |
| mixr  | AdviR    | 3 | INV | 1.432082 |
| mixr  | Roun     | 1 | INV | 1.227438 |
| mixr  | Roun     | 2 | INV | 1.101355 |
| mixr  | Roun     | 3 | INV | 0.754275 |
| mixr  | AdviRoun | 1 | INV | 1.032561 |
| mixr  | AdviRoun | 2 | INV | 1.205157 |
| mixr  | AdviRoun | 3 | INV | 1.17944  |
| mixbl | AdviBL   | 1 | INV | 0.875327 |
| mixbl | AdviBL   | 2 | INV | 1.369971 |
| mixbl | AdviBL   | 3 | INV | 1.432082 |
| mixbl | Bela     | 1 | INV | 1.059717 |
| mixbl | Bela     | 2 | INV | 1.451362 |
| mixbl | Bela     | 3 | INV | 1.058425 |
| mixbl | AdviBela | 1 | INV | 1.066759 |
| mixbl | AdviBela | 2 | INV | 1.272521 |
| mixbl | AdviBela | 3 | INV | 1.48816  |
| mixt  | AdviT    | 1 | INV | 0.875327 |
| mixt  | AdviT    | 2 | INV | 1.369971 |
| mixt  | AdviT    | 3 | INV | 1.432082 |
| mixt  | Tran     | 1 | INV | 1.140373 |
| mixt  | Tran     | 2 | INV | 1.300494 |
| mixt  | Tran     | 3 | INV | 1.249976 |
| mixt  | AdviTran | 1 | INV | 1.230278 |
| mixt  | AdviTran | 2 | INV | 1.151975 |
| mixt  | AdviTran | 3 | INV | 0.903975 |

run;
